# Supplementary material for: What information needs do people with recently diagnosed diabetes mellitus have and what are the associated factors? A cross-sectional study in Germany
Source: PubMed Central journal article supplement — BMJ Open. 2018 Oct 31;8(10):e017895. doi: 10.1136/bmjopen-2017-017895 (PMC6252653; doi:10.1136/bmjopen-2017-017895), 2018-10-31
Supplement: bmjopen-2017-017895supp002.pdf [file bmjopen-2017-017895supp002.pdf]

## Appendix 2

Appendix 2a: Information needs and associated factors, results of the multivariate regression analysis, in the stratum of subjects with type 1 diabetes<sup>1</sup>

|                                               | Clinical-related information needs<br>(n=41) |               |               | Management-related information<br>needs (n=44) |               |               | Diabetes research <sup>2</sup> |         |         |
|-----------------------------------------------|----------------------------------------------|---------------|---------------|------------------------------------------------|---------------|---------------|--------------------------------|---------|---------|
|                                               | OR                                           | 95-% CI       | p-value       | OR                                             | 95-% CI       | p-value       | OR                             | 95-% CI | p-value |
| <b>Socio-demographic variables</b>            |                                              |               |               |                                                |               |               |                                |         |         |
| age (years)                                   | 1.04                                         | [0.95; 1.14]  | 0.366         | 1.07                                           | [0.92; 1.19]  | 0.279         | -                              | -       | -       |
| sex (male)                                    | 3.45                                         | [0.63; 19.05] | 0.155         | 5.20                                           | [0.70; 38.83] | 0.108         | -                              | -       | -       |
| education (university degree)                 | 3.56                                         | [0.54; 23.30] | 0.186         | 1.44                                           | [0.17; 12.60] | 0.741         | -                              | -       | -       |
| <b>Diagnosis-related variables</b>            |                                              |               |               |                                                |               |               |                                |         |         |
| diabetes-related comorbidity (yes)            | 0.90                                         | [0.09; 8.98]  | 0.93          | 0.73                                           | [0.04; 14.09] | 0.836         | -                              | -       | -       |
| <b>Current level of information (outcome)</b> |                                              |               |               |                                                |               |               |                                |         |         |
| current level of information (high)           | 0.17                                         | [0.03; 0.92]  | <b>0.040*</b> | 0.11                                           | [0.02; 0.75]  | <b>0.024*</b> | -                              | -       | -       |
| <b>Health-related quality of life</b>         |                                              |               |               |                                                |               |               |                                |         |         |
| physical component summary score (SF-36)      | 0.93                                         | [0.85; 1.03]  | 0.175         | 1.05                                           | [0.93; 1.18]  | 0.436         | -                              | -       | -       |
| mental component summary score (SF-36)        | 0.98                                         | [0.93; 1.04]  | 0.537         | 0.87                                           | [0.76; 0.995] | <b>0.041*</b> | -                              | -       | -       |
| <b>Lifestyle</b>                              |                                              |               |               |                                                |               |               |                                |         |         |
| BMI $\geq$ 30 kg/m <sup>2</sup>               | 3.08                                         | [0.32; 29.98] | 0.332         | 0.90                                           | [0.08; 10.05] | 0.934         | -                              | -       | -       |

<sup>1</sup> Covariable 'antihyperglycaemic medication' was excluded because very few people with type 1 did not use antihyperglycaemic medication

<sup>2</sup> The corresponding model for the outcome 'diabetes research' was instable because all people with type 1 diabetes were in need of diabetes research

\*significant results (p<0.05)

OR= odds ratio (in age and SF-36 scores corresponding to one unit change)

CI= confidence intervals

SF-36= 36-Item Short-Form Health Survey

BMI= body-mass index

Appendix 2b: Information needs and associated factors, results of the multivariate regression analysis, in the stratum of subjects with type 2 diabetes

|                                               | Clinical-related information needs<br>(n=55) |              |         | Management-related information<br>needs (n=53) |               |         | Diabetes research<br>(n=56) |               |               |
|-----------------------------------------------|----------------------------------------------|--------------|---------|------------------------------------------------|---------------|---------|-----------------------------|---------------|---------------|
|                                               | OR                                           | 95-% CI      | p-value | OR                                             | 95-% CI       | p-value | OR                          | 95-% CI       | p-value       |
| <b>Socio-demographic variables</b>            |                                              |              |         |                                                |               |         |                             |               |               |
| age (years)                                   | 1.04                                         | [0.97; 1.12] | 0.296   | 1.05                                           | [0.96; 1.15]  | 0.300   | 1.01                        | [0.92; 1.11]  | 0.801         |
| sex (male)                                    | 0.82                                         | [0.19; 3.60] | 0.794   | 0.59                                           | [0.09; 3.72]  | 0.573   | 0.43                        | [0.07; 2.61]  | 0.358         |
| education (university degree)                 | 0.42                                         | [0.11; 1.67] | 0.218   | 1.18                                           | [0.24; 5.78]  | 0.842   | 0.82                        | [0.18; 3.77]  | 0.804         |
| <b>Diagnosis-related variables</b>            |                                              |              |         |                                                |               |         |                             |               |               |
| antihyperglycaemic medication (yes)           | 0.82                                         | [0.20; 3.47] | 0.790   | 1.63                                           | [0.30; 8.96]  | 0.576   | 6.98                        | [1.38; 35.21] | <b>0.019*</b> |
| diabetes-related comorbidity (yes)            | 0.73                                         | [0.12; 4.32] | 0.725   | 0.22                                           | [0.03; 1.58]  | 0.133   | 0.04                        | [0.01; 0.38]  | <b>0.004*</b> |
| <b>Current level of information (outcome)</b> |                                              |              |         |                                                |               |         |                             |               |               |
| current level of information (high)           | 0.42                                         | [0.11; 1.66] | 0.214   | 0.28                                           | [0.05; 1.72]  | 0.171   | 1.84                        | [0.31; 10.84] | 0.503         |
| <b>Health-related quality of life</b>         |                                              |              |         |                                                |               |         |                             |               |               |
| physical component summary score (SF-36)      | 0.98                                         | [0.93; 1.03] | 0.447   | 1.01                                           | [0.95; 1.08]  | 0.731   | 0.96                        | [0.90; 1.03]  | 0.270         |
| mental component summary score (SF-36)        | 1.00                                         | [0.93; 1.07] | 0.997   | 0.99                                           | [0.92; 1.07]  | 0.804   | 1.04                        | [0.96; 1.13]  | 0.342         |
| <b>Lifestyle</b>                              |                                              |              |         |                                                |               |         |                             |               |               |
| BMI $\geq$ 30 kg/m <sup>2</sup>               | 0.36                                         | [0.09; 1.44] | 0.148   | 2.55                                           | [0.51; 12.89] | 0.257   | 0.63                        | [0.14; 2.84]  | 0.551         |

\*significant results (p<0.05)

OR= odds ratio (in age and SF36 scores corresponding to one unit change)

CI= confidence intervals

SF-36= 36-Item Short-Form Health Survey

BMI= body-mass index
